# Supplementary material for: Unravelling the anticancer potential of a square planar copper complex: toward non-platinum chemotherapy
Source: Royal Society of Chemistry journal article supplement (doi:10.1039/d1ra06227a), 2021-01-01
Supplement: d1ra06227a1.pdf [file d1ra06227a1.pdf]

**SUPPORTING INFORMATION**

**Unravelling the anticancer potential of a square planar copper complex: toward non-platinum chemotherapy**

**Manzoor Ahmad Malik<sup>1,2\*</sup>, Md Kausar Raza<sup>3†</sup>, Arif Mohammed<sup>4</sup>, Mohmmad Younus Wani<sup>5\*</sup>, Abdullah Saad Al-Bogami<sup>5</sup>, Athar Adil Hashmi<sup>1</sup>**

*<sup>1</sup>Bioinorganic Lab., Department of Chemistry, Jamia Millia Islamia, New Delhi 110025, India.*

*<sup>2</sup>Department of Chemistry, University of Kashmir, Srinagar, Jammu and Kashmir, India. <sup>3</sup>Department of Inorganic and Physical Chemistry, Indian Institute of Science, Bangalore 560012, India. <sup>4</sup>University of Jeddah, College of Science, Department of Biology, Jeddah 21589, Saudi Arabia. <sup>5</sup>University of Jeddah, College of Science, Department of Chemistry, Jeddah 21589, Saudi Arabia. †Division of Chemistry and Chemical Engineering, California Institute of Technology, Pasadena, CA 91125, United States*

Correspondence: [mwani@uj.edu.sa](mailto:mwani@uj.edu.sa) (MYW); [manzoormalik.kash@gmail.com](mailto:manzoormalik.kash@gmail.com) (MAM)

ORCID: <https://orcid.org/0000-0002-1838-1337> (MYW)

## Table of Contents

### Scheme

**Scheme S1.** Synthetic scheme for the ligand (SB) and the complexes C1-C3.

### Figures

**Figure S1.** IR spectrum of **SB** in solid phase

**Figure S2.** IR spectrum of complex **C1** in solid phase

**Figure S3.** IR spectrum of complex **C2** in solid phase

**Figure S4.** IR spectrum of complex **C3** in solid phase

**Figure S5.** Mass spectrum of ligand **SB** in MeOH

**Figure S6.** Mass spectrum of complex **C1** in MeOH

**Figure S7.** Mass spectrum of complex **C2** in MeOH

**Figure S8.** Mass spectrum of complex **C3** in MeOH

**Figure S9.** <sup>1</sup>H NMR spectrum of ligand **SB** in DMSO-d<sub>6</sub>

**Figure S10.** <sup>13</sup>C NMR spectrum of ligand **SB** in DMSO-d<sub>6</sub>

**Figure S11.** TG curves of complexes **C1-C3**.

**Figure S12.** Unit cell packing diagram of ligand **SB**

### Tables

**Table T1.** Selected crystallographic data and structure refinement for Ligand (SB).

**Table T2.** Selected bond distances (Å) and angles (°) for the ligand **SB**

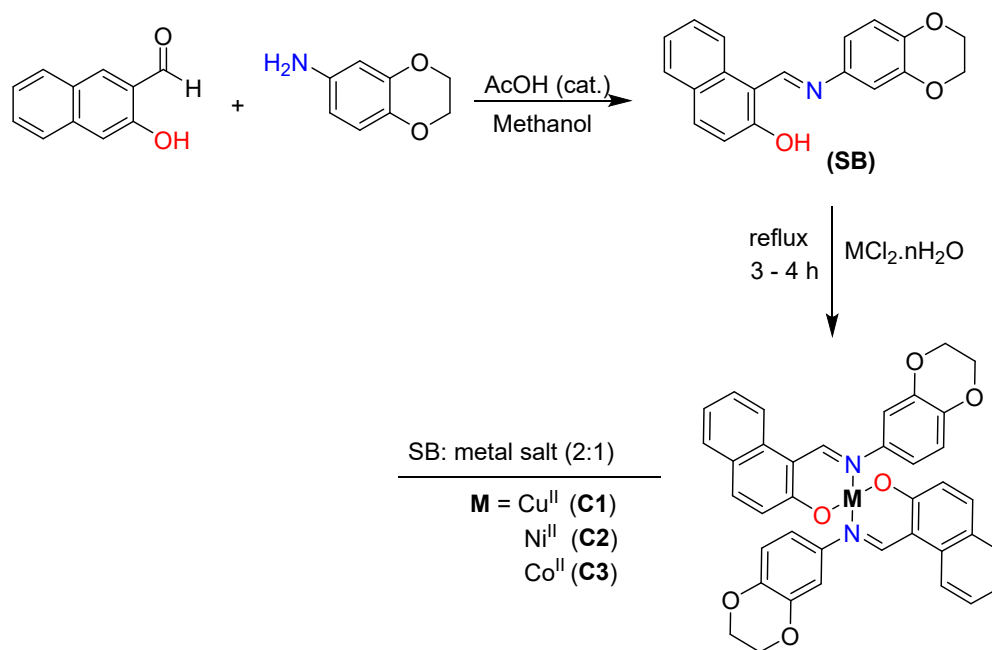

**Scheme S1.** Synthesis of Schiff base ligand and its metal [Cu(C1), Ni(C2) and Co(C3)] complexes in 2:1 (L:M) ratio.

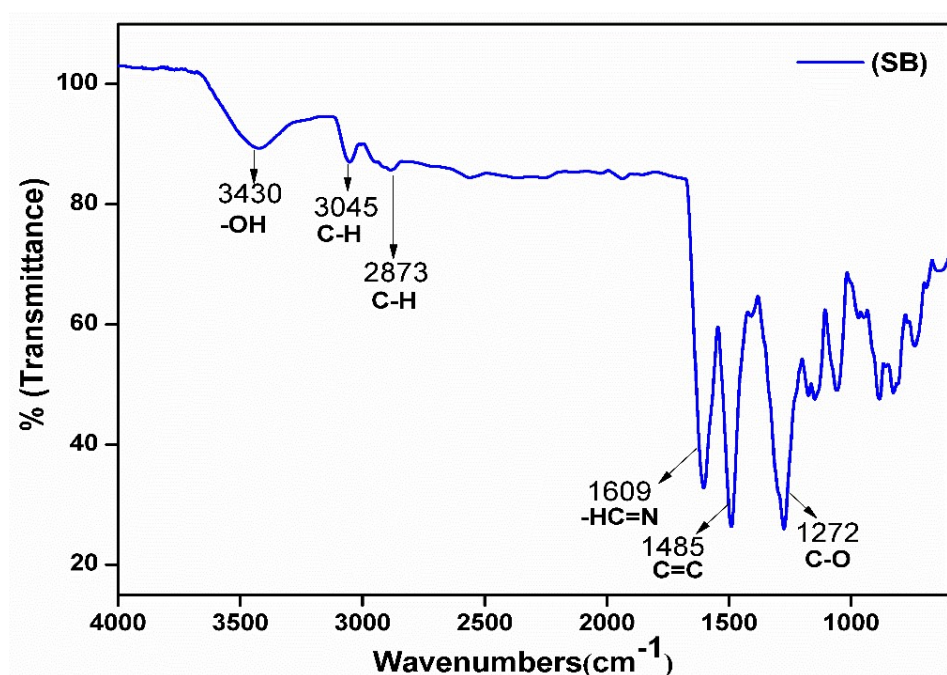

**Fig. S1.** IR spectrum of SB in solid phase

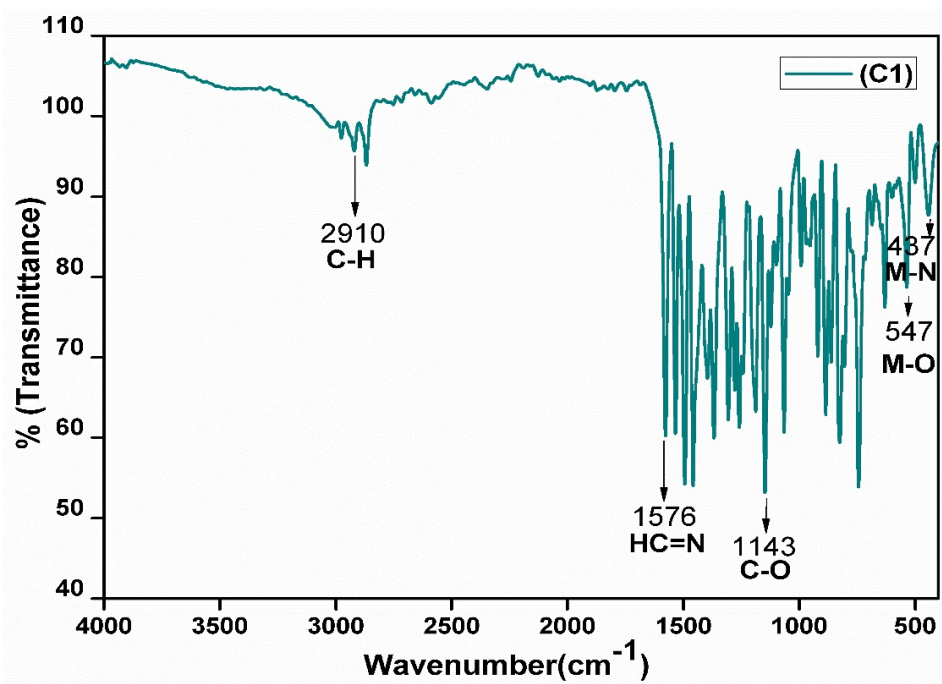

Fig. S2. IR spectrum of complex C1 in solid phase

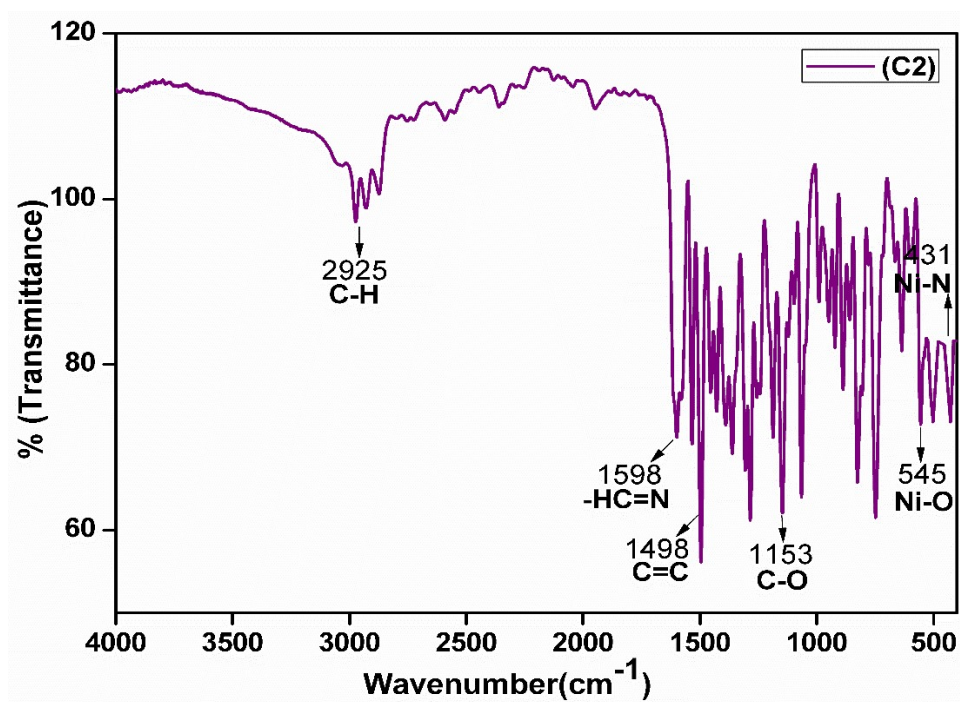

Fig. S3. IR spectrum of complex C2 in solid phase

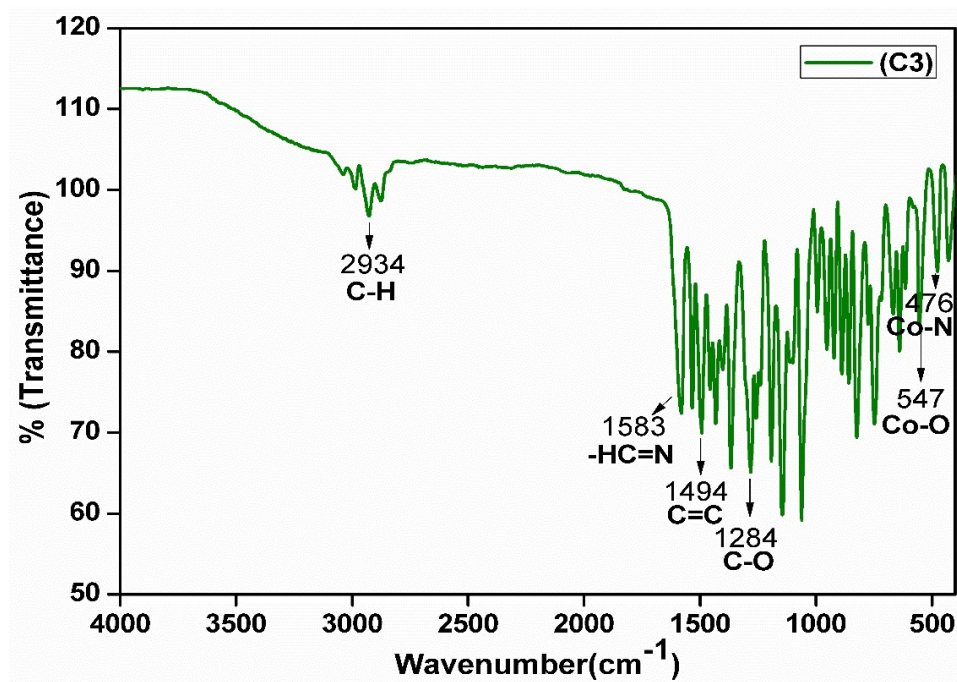

Fig. S4. IR spectrum of complex C3 in solid phase

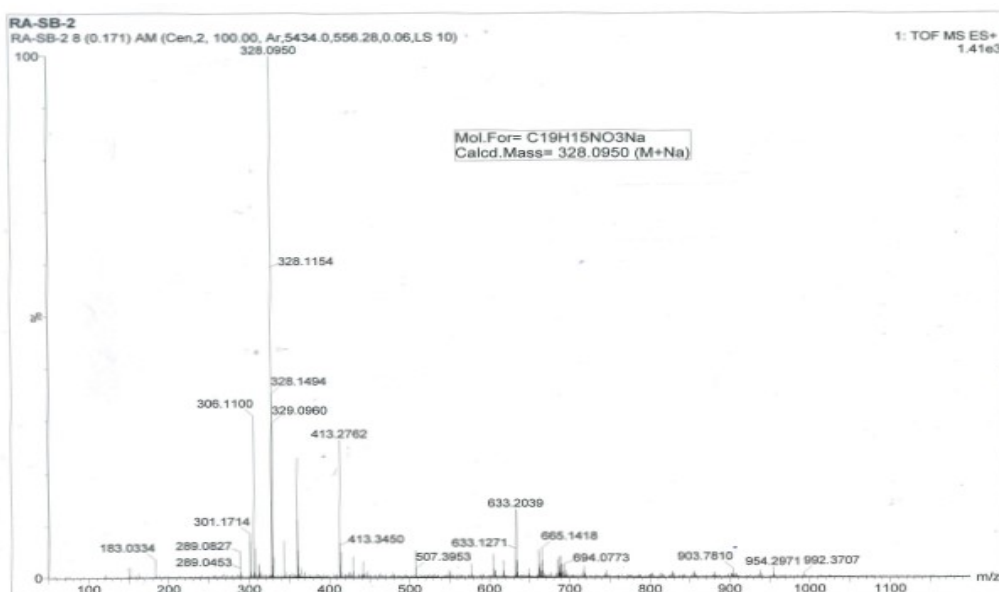

Fig. S5. Mass spectrum of ligand SB

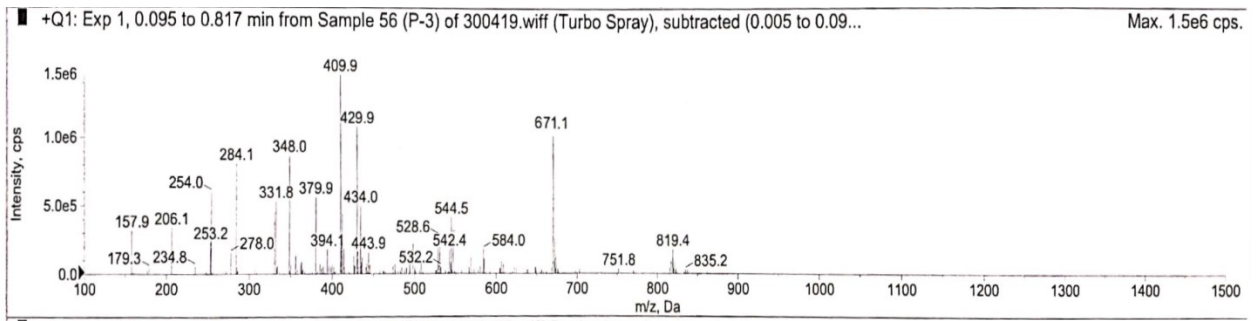

**Fig. S6.** Mass spectrum of complex C1 in MeOH

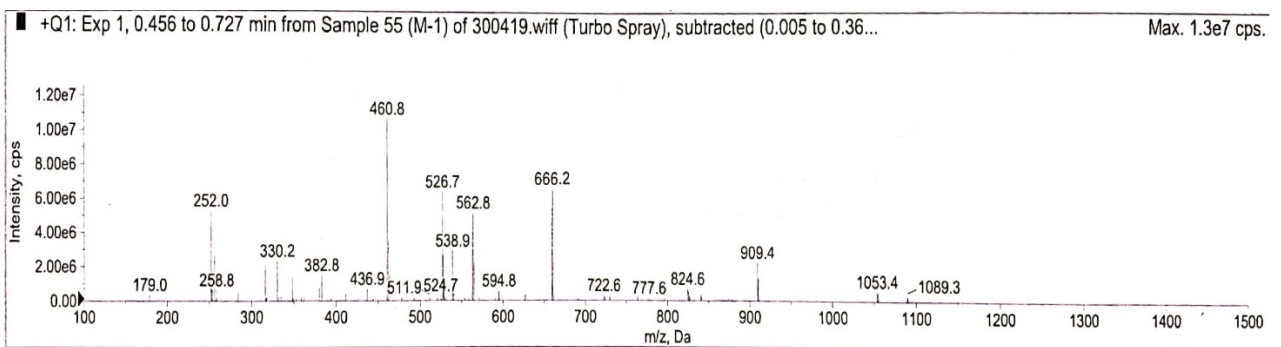

**Fig. S7.** Mass spectrum of complex C2 in MeOH

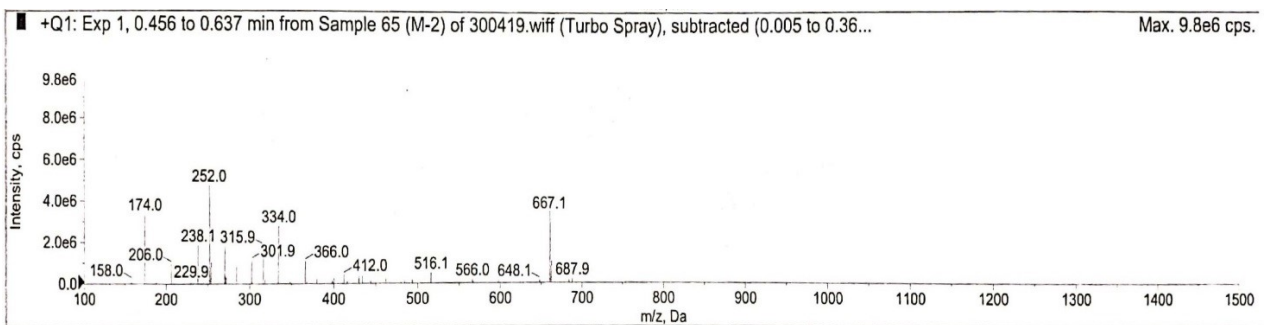

**Fig. S8.** Mass spectrum of complex C3 in MeOH.

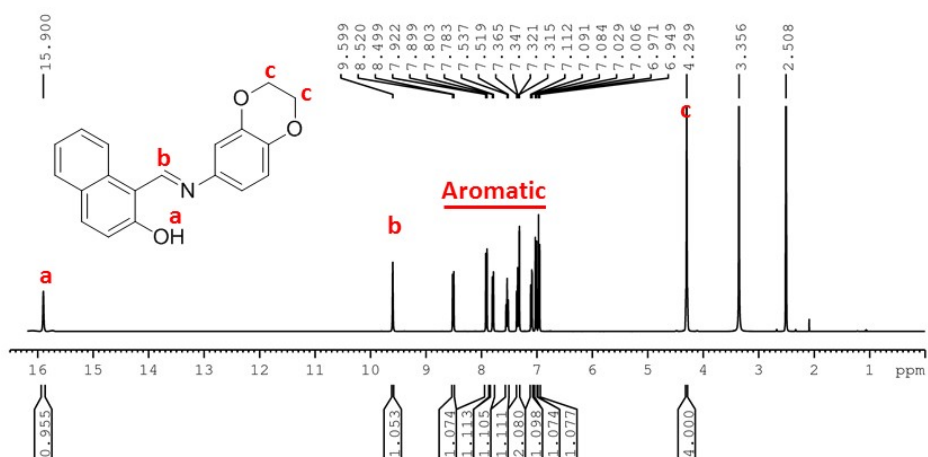

Fig. S9.  $^1\text{H-NMR}$  spectrum of the Schiff base (SB) ligand.

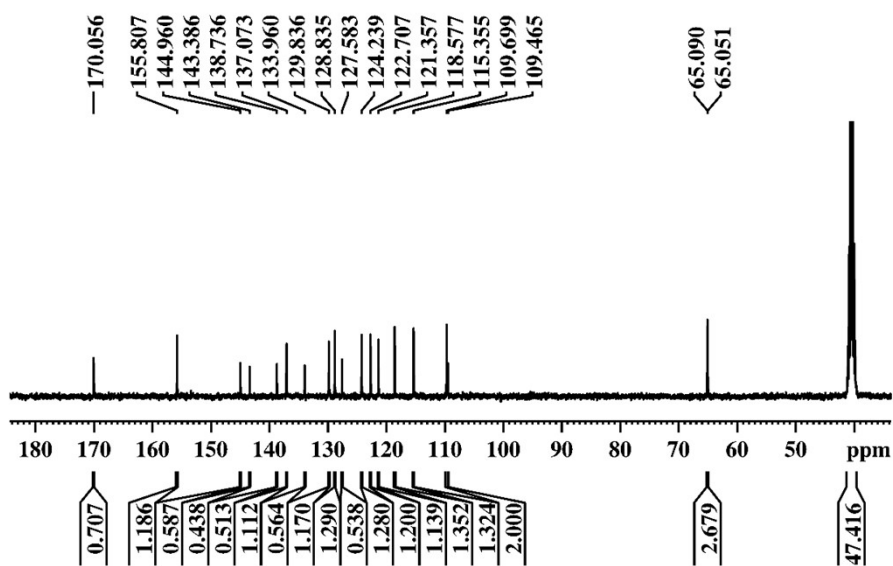

Fig. S10.  $^{13}\text{C-NMR}$  spectrum of ligand SB



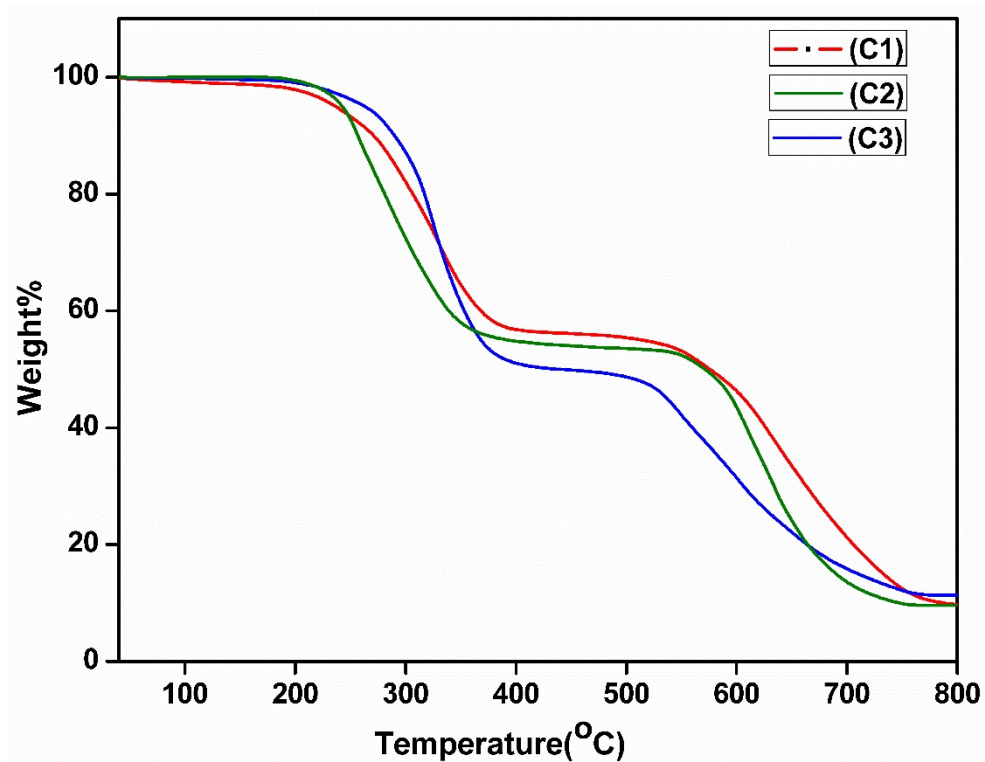

Figure S11. TG curves of complexes C1-C3.

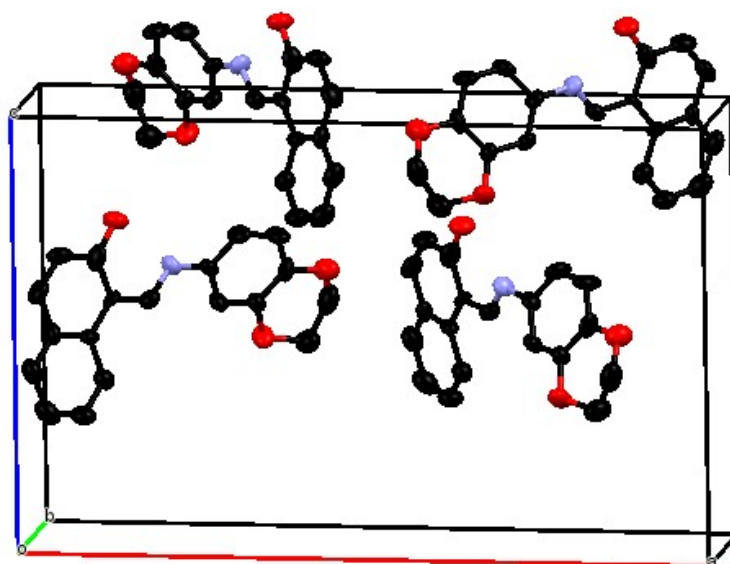

Figure S13a. Unit cell packing diagram of the ligand SB without hydrogen.



**Table T1.** Selected crystallographic data and structure refinement for Ligand (SB).

|                                              |                                                  |
|----------------------------------------------|--------------------------------------------------|
| Empirical formula                            | C <sub>19</sub> H <sub>15</sub> NO <sub>3</sub>  |
| Formula weight                               | 305.11                                           |
| Temperature                                  | 296(2) K                                         |
| Wavelength                                   | 0.71073 Å                                        |
| Crystal system                               | Orthorhombic                                     |
| Space group                                  | P n a 21                                         |
| <i>a</i> /Å                                  | 21.472(4) Å                                      |
| <i>b</i> /Å                                  | 5.0739(10) Å                                     |
| <i>c</i> /Å                                  | 13.630(3) Å                                      |
| $\alpha$ °                                   | 90°                                              |
| $\beta$ °                                    | 90°                                              |
| $\gamma$ °                                   | 90°                                              |
| Volume/Å <sup>3</sup>                        | 1484.9(5)                                        |
| Z                                            | 4                                                |
| T/K                                          | 296(2)K                                          |
| Density <sub>calcd</sub> /Mg m <sup>-3</sup> | 1.361                                            |
| Data/restraints/param                        | 1010/1/208                                       |
| F(000)                                       | 636                                              |
| GOF                                          | 0.822                                            |
| Reflections collected                        | 1010                                             |
| Largest diff peak, hole (e Å <sup>-3</sup> ) | 0.094, -0.127                                    |
| Final R indexes [ <i>I</i> ≥2σ ( <i>I</i> )] | R <sub>1</sub> =0.0323, wR <sub>2</sub> = 0.0862 |

**Table T2.** Bond distances (Å) and bond angles (°) for the Schiff base ligand (SB).

| Bond distances (Å) |           | Bond angles (°) |           |
|--------------------|-----------|-----------------|-----------|
| O1 C10             | 1.377(9)  | C10 O1 C11      | 112.9(7)  |
| O1 C11             | 1.412(9)  | C6 N1 C7        | 122.1(7)  |
| O2 C13             | 1.363(8)  | C1 C2 C3        | 120.1(7)  |
| O2 C14             | 1.429(9)  | C2 C3 C17       | 121.5(10) |
| O3 C15             | 1.324(10) | C3 C4 C5        | 120.5(9)  |
| N1 C6              | 1.275(8)  | N1 C6 C5        | 124.6(8)  |
| N1 C7              | 1.412(9)  | N1 C6 H7        | 117.7     |
| C1 C2              | 1.374(10) | C5 C6 H7        | 117.7     |
| C1 H1              | 0.9300    | C12 C7 N1       | 124.2(8)  |
| C5 C15             | 1.403(10) | O1 C10 C9       | 117.2(9)  |
| C5 C6              | 1.420(10) | O1 C11 C14      | 113.2(6)  |
| C6 H7              | 0.9300    | O1 C11 H3       | 108.9     |
| C11 H3             | 0.9700    | O1 C11 H2       | 108.9     |
| C11 H2             | 0.9700    | C7 C12 C13      | 121.4(8)  |
| C14 H5             | 0.9700    | O2 C13 C10      | 122.5(9)  |
| C14 H6             | 0.9700    | O3 C15 C5       | 123.6(8)  |
